# Supplementary material for: Macroseismic intensity attenuation models calibrated in Mw for Italy
Source: Springer Nature journal article supplement (doi:10.1007/s10518-023-01822-8), 2023-11-28
Supplement: MOESM2 [file 10518_2023_1822_MOESM2_ESM.pdf]

## Macroseismic intensity attenuation models calibrated in Mw for Italy

### Bulletin of Earthquake Engineering

A. A. Gomez-Capera<sup>1</sup>, M. Santulin<sup>2</sup>, M. D'Amico<sup>1</sup>, V. D'Amico<sup>3</sup>, M. Locati<sup>1</sup>, C. Meletti<sup>3</sup>, E. Varini<sup>4</sup>

<sup>1</sup> Istituto Nazionale di Geofisica e Vulcanologia, sezione di Milano

<sup>2</sup> Istituto Nazionale di Oceanografia e di Geofisica Sperimentale, Trieste

<sup>3</sup> Istituto Nazionale di Geofisica e Vulcanologia, sezione di Pisa

<sup>4</sup> Istituto di Matematica Applicata e Tecnologie Informatiche "Enrico Magenes"

**Table A1** Instrumental parameters of earthquakes (CPTI15) used for calibration process
